# Supplementary material
Source: PubMed Central journal article supplement (PMC7666080)
Supplement: NIHMS1602249-supplement-2.pdf [file NIHMS1602249-supplement-2.pdf]

Supplementary Figure 1 | Source gel data

Extended Data Fig. 1e

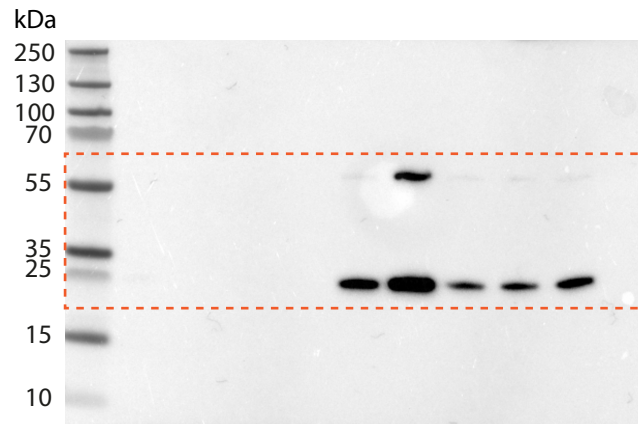

Extended Data Fig. 6d

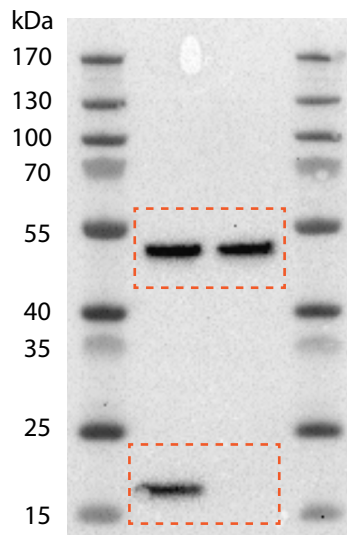

Extended Data Fig. 7c

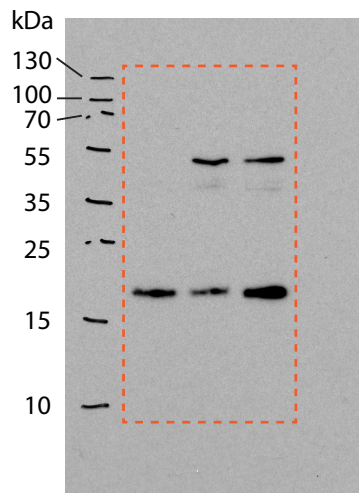

Supplementary Figure 2 | Individual cell plots

Figure 4f

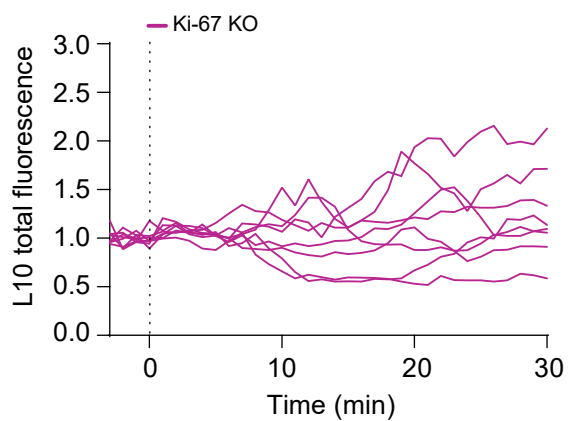

Extended Data Figure 10 h

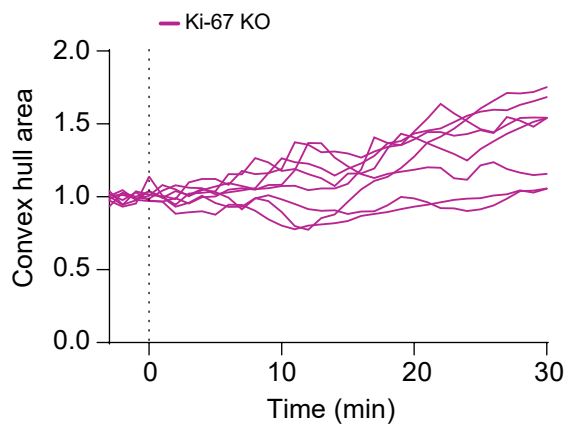

## Supplementary Table 1 | Cell lines used in this study

| Background | Cell line name                               | Reference                                                                                                                          | Lab ID |
|------------|----------------------------------------------|------------------------------------------------------------------------------------------------------------------------------------|--------|
| HeLa Kyoto | EGFP-Encapsulin; H2B-mCherry                 | Generated and verified in this study (Extended Data Fig. 1a- c)                                                                    | 1701   |
| HeLa Kyoto | H2B-mCherry; L10-EGFP                        | Generated via lentiviral transduction and verified in this study (Extended Data Fig. 1a-c)                                         | 1772   |
| HeLa Kyoto | HKF1; H2BmCherry; IBB-EGFP                   | Schmitz et al., Nat. Cell Biology, 2010                                                                                            | 172    |
| HeLa Kyoto | Actin-GFP; H2B-mCherry                       | Steigmann et al., Cell, 2009                                                                                                       | 161    |
| HeLa Kyoto | L10-EGFP                                     | Generated in this study via lentiviral transduction                                                                                | 1815   |
| HeLa Kyoto | Ki-67 KO L10-EGFP                            | Generated in this study via lentiviral transduction                                                                                | 1816   |
| HeLa Kyoto | Encapsulin-EGFP                              | Generated in this study via lentiviral transduction                                                                                | 1819   |
| HeLa Kyoto | Ki-67 KO Encapsulin-EGFP                     | Generated in this study via lentiviral transduction                                                                                | 1820   |
| HeLa Kyoto | IBB-EGFP                                     | Generated in this study via lentiviral transduction                                                                                | 1813   |
| HeLa Kyoto | H2B-mCherry                                  | Generated in this study via lentiviral transduction                                                                                | 1693   |
| HeLa Kyoto | CENPA-GFP; H2B-mcherry                       | Derived from CENP-A-GFP cell line as described in Wurzenberger et al., 2012; additionally, H2B-mcherry-IRESpuro2 was introduced    | 398    |
| HeLa Kyoto | EGFP-MKI67 (homozygous)                      | Cuylen et al., 2016                                                                                                                | 1336   |
| HeLa Kyoto | HeLa Wildtype                                | Obtained from S. Narumiya (Kyoto University, Japan), validated by a Multiplex human Cell line Authentication test (MCA), 21.04.16. | 1      |
| HeLa Kyoto | HKF1; H2B-mCherry                            | Steigmann et al., Cell, 2009                                                                                                       | 137    |
| HeLa Kyoto | HKF1; H2B-mCherry                            | Generated in this study                                                                                                            | 140    |
| HeLa Kyoto | Ki-67 KO                                     | Cuylen et al., 2016                                                                                                                | 1102   |
| HeLa       | AcFL-LAP2 $\beta$ ; H2B-mCherry              | Obtained from M. Petronczki, published in Takaki et al., 2017                                                                      | 1150   |
| HeLa Kyoto | TET3G endotropic receptor (RIEP)             | Published in Samwer et al. 2017                                                                                                    | 1081   |
| HeLa Kyoto | Ki-67 KO TET3G endotropic receptor (RIEP)    | Generated in this study                                                                                                            | 1499   |
| HeLa Kyoto | BAF-EGFP, H2B-mCherry                        | Generated in this study                                                                                                            | 1114   |
| HeLa Kyoto | Myr-Palm-mEGFP                               | Generated in this study                                                                                                            | 619    |
| HeLa Kyoto | MKI67(RASA) (homozygous)                     | Generated in this study                                                                                                            | 1177   |
| HeLa Kyoto | Ki-67 KO H2B-mCherry (strong overexpression) | Generated in this study                                                                                                            | 1582   |

## Supplementary Table 2 | Plasmids used in this study

| Plasmid name                   | Vector backbone       | Source                                                           | Lab ID |
|--------------------------------|-----------------------|------------------------------------------------------------------|--------|
| Encapsulin-EGFP_IRESNeo3       | IRESneo3              | Encapsulin gene amplified from a plasmid obtained from Liam Holt | 1688   |
| Lenti_L10-EGFP_IRES_Hygro      | Lenti_SFFV IRES_Hyg   | L10 gene amplified from a plasmid obtained from Tchorzewski lab  | 1770   |
| Lenti_Encapsulin-EGFP_IRES_neo | Lenti_SFFV_IRES_Neo   | Encapsulin gene amplified from a plasmid obtained from Liam Holt | 1795   |
| Lenti_IBB-EGFP_Blast           | Lenti_EF1a_IRES_Blast | Generated in this study                                          | 1406   |
| H2B-mCherry                    | IRESpuro2             | Steigmann et al., Cell, 2009                                     | 191    |
| <b>H2B-mCherry</b>             | IRESneo3              | Generated in this study                                          | 192    |
| GFP-NES                        | EGFP-C3               | Generated in this study                                          | 27     |
| EGFP-Ki-67-mCherry             | IRESpuro2             | Cuylen et al., 2016                                              | 1371   |
| mCherry-Ki-67-EGFP             | IRESpuro2             | Cuylen et al., 2016                                              | 1368   |
| H2B-mNeonGreen                 | IRESpuro2             | Cuylen et al., 2016                                              | 703    |
| EGFP-BAF                       | Lenti_EF1a_IRES_Blast | Samwer et al., 2017                                              | 1149   |
| MyrPalm-mEGFP                  | IRESpuro2             | Generated in this study                                          | 135    |
| H2B-mNeonGreen-FRB             | IRESpuro2             | Generated in this study                                          | 1071   |
| H2B-mCherry-FKBP               | IRESpuro3             | Generated in this study                                          | 948    |
| EGFP-Ki-67                     | IRESpuro2             | Generated in this study                                          | p-343  |
| mCherry-Ki-67(RASA)-EGFP       | IRESpuro2             | Generated in this study                                          | 1551   |
| EGFP-Ki-67(RASA)-mCherry       | IRESpuro2             | Generated in this study                                          | 1552   |
